# Supplementary material
Source: Springer Nature journal article supplement (https://www.springermedizin.de/resource/supplementary/12985_2009_574_MOESM6_ESM.pdf/9608482)

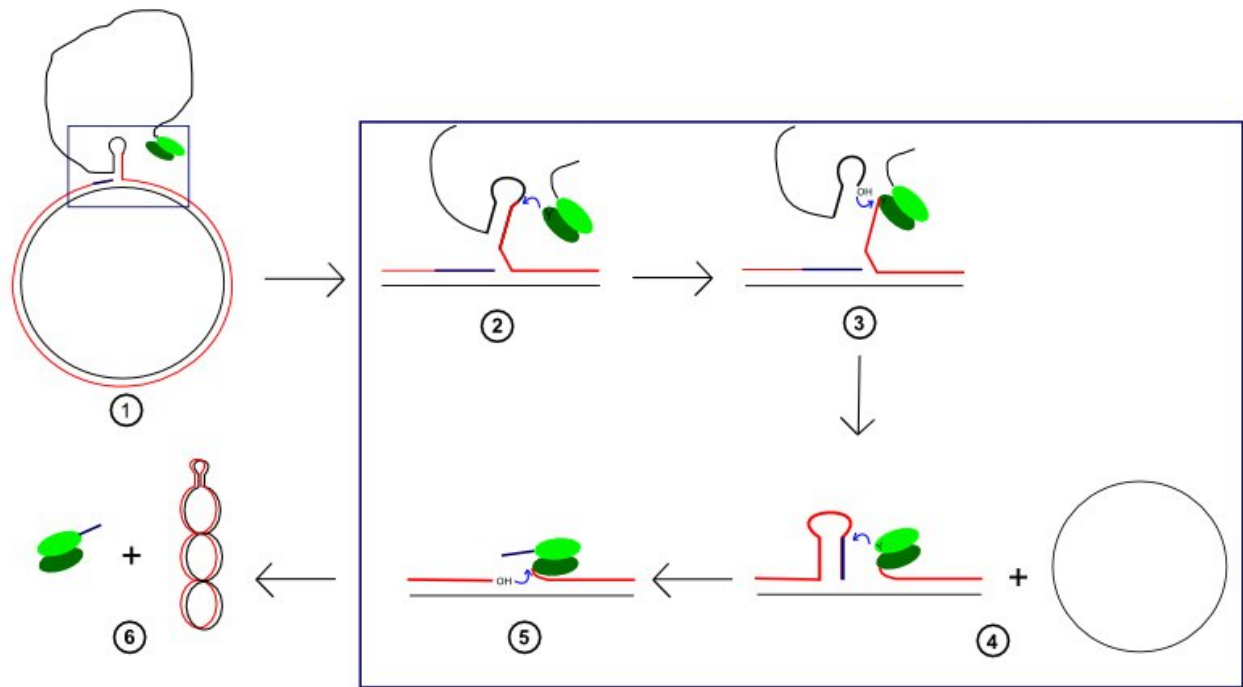

Supplement: MOESM6 [file 9608482]
